**Figure S1.**

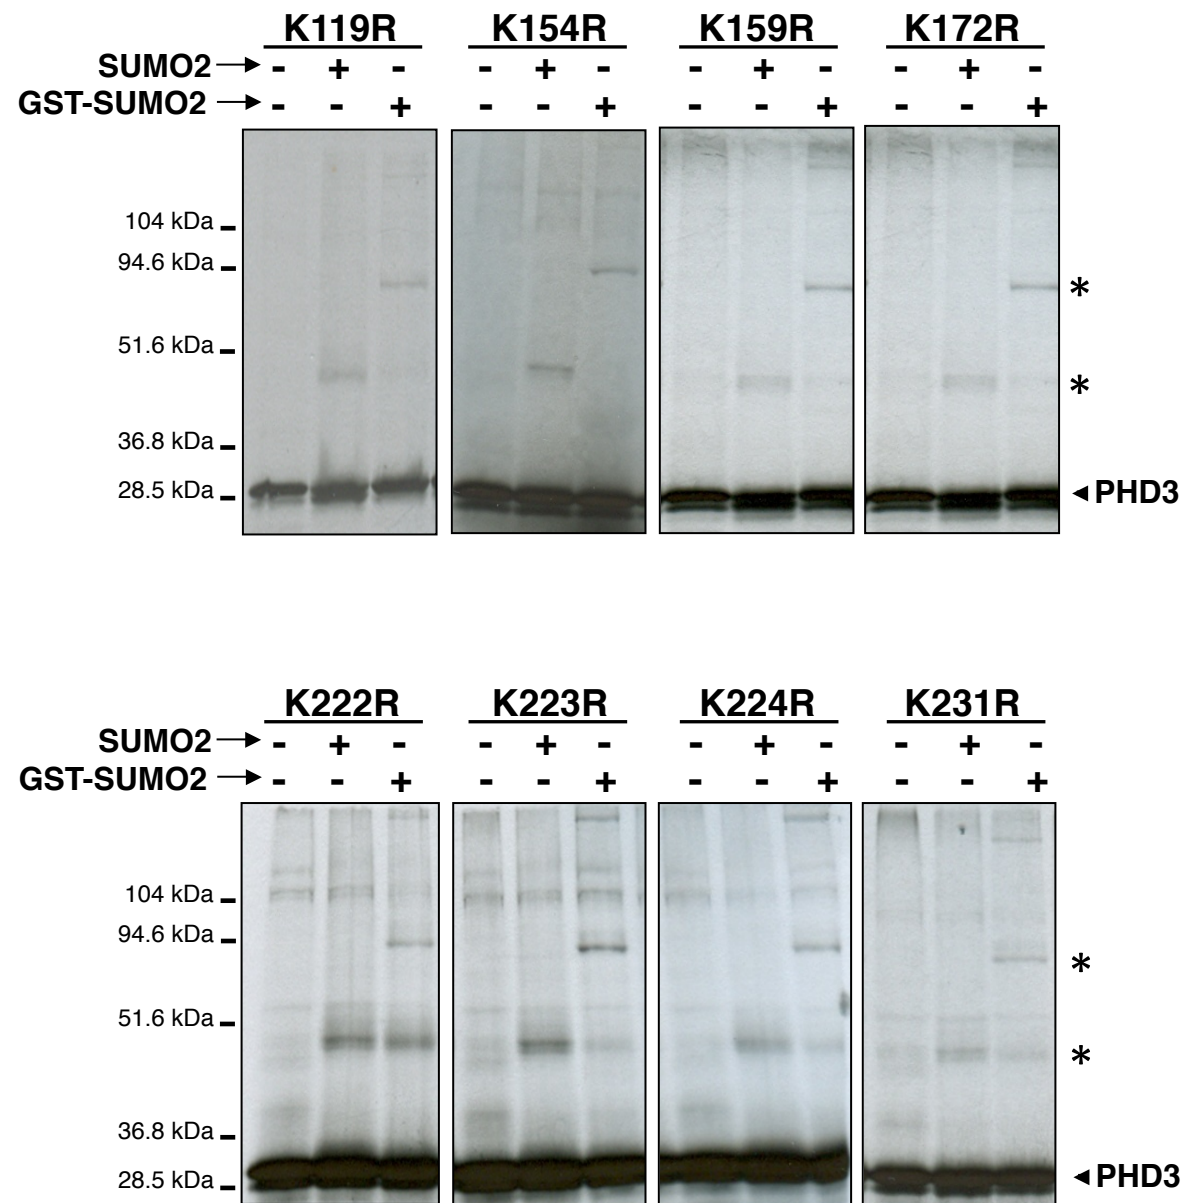

**Figure S2.**

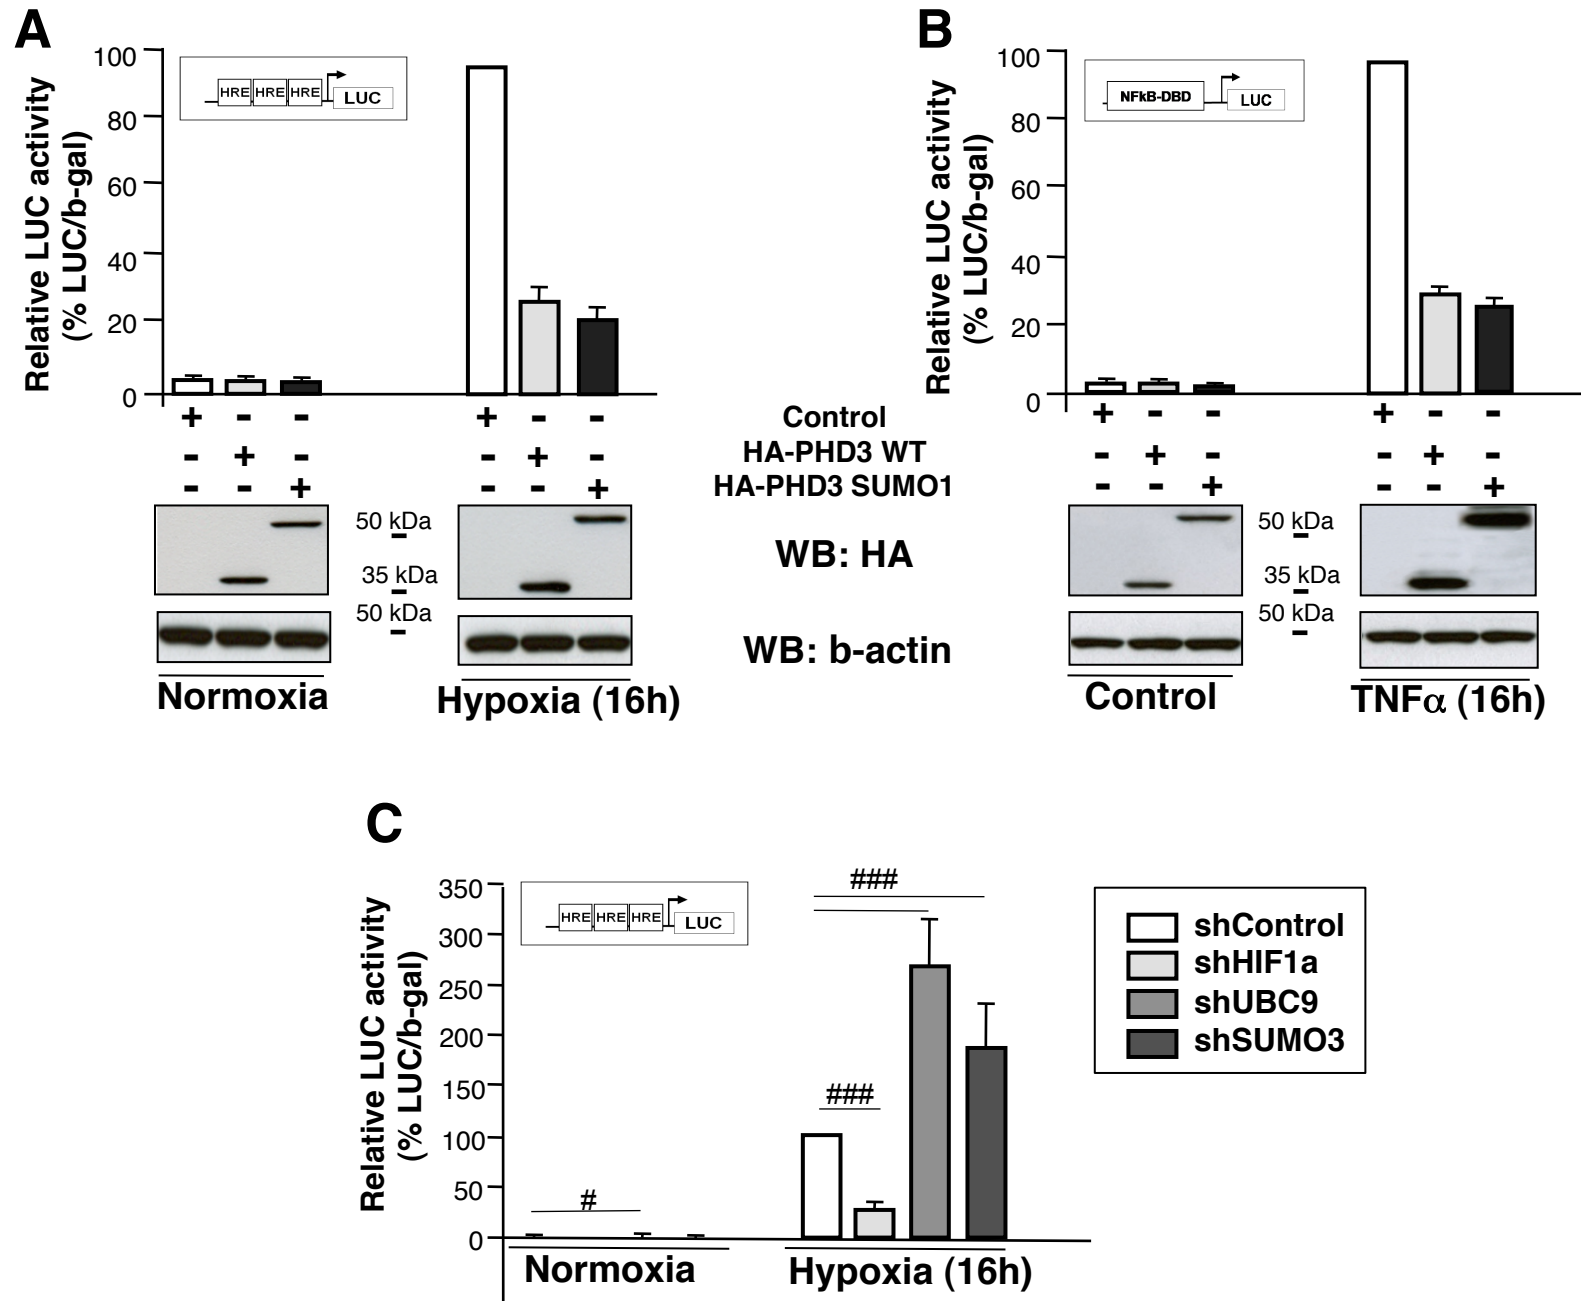

Figure S3.

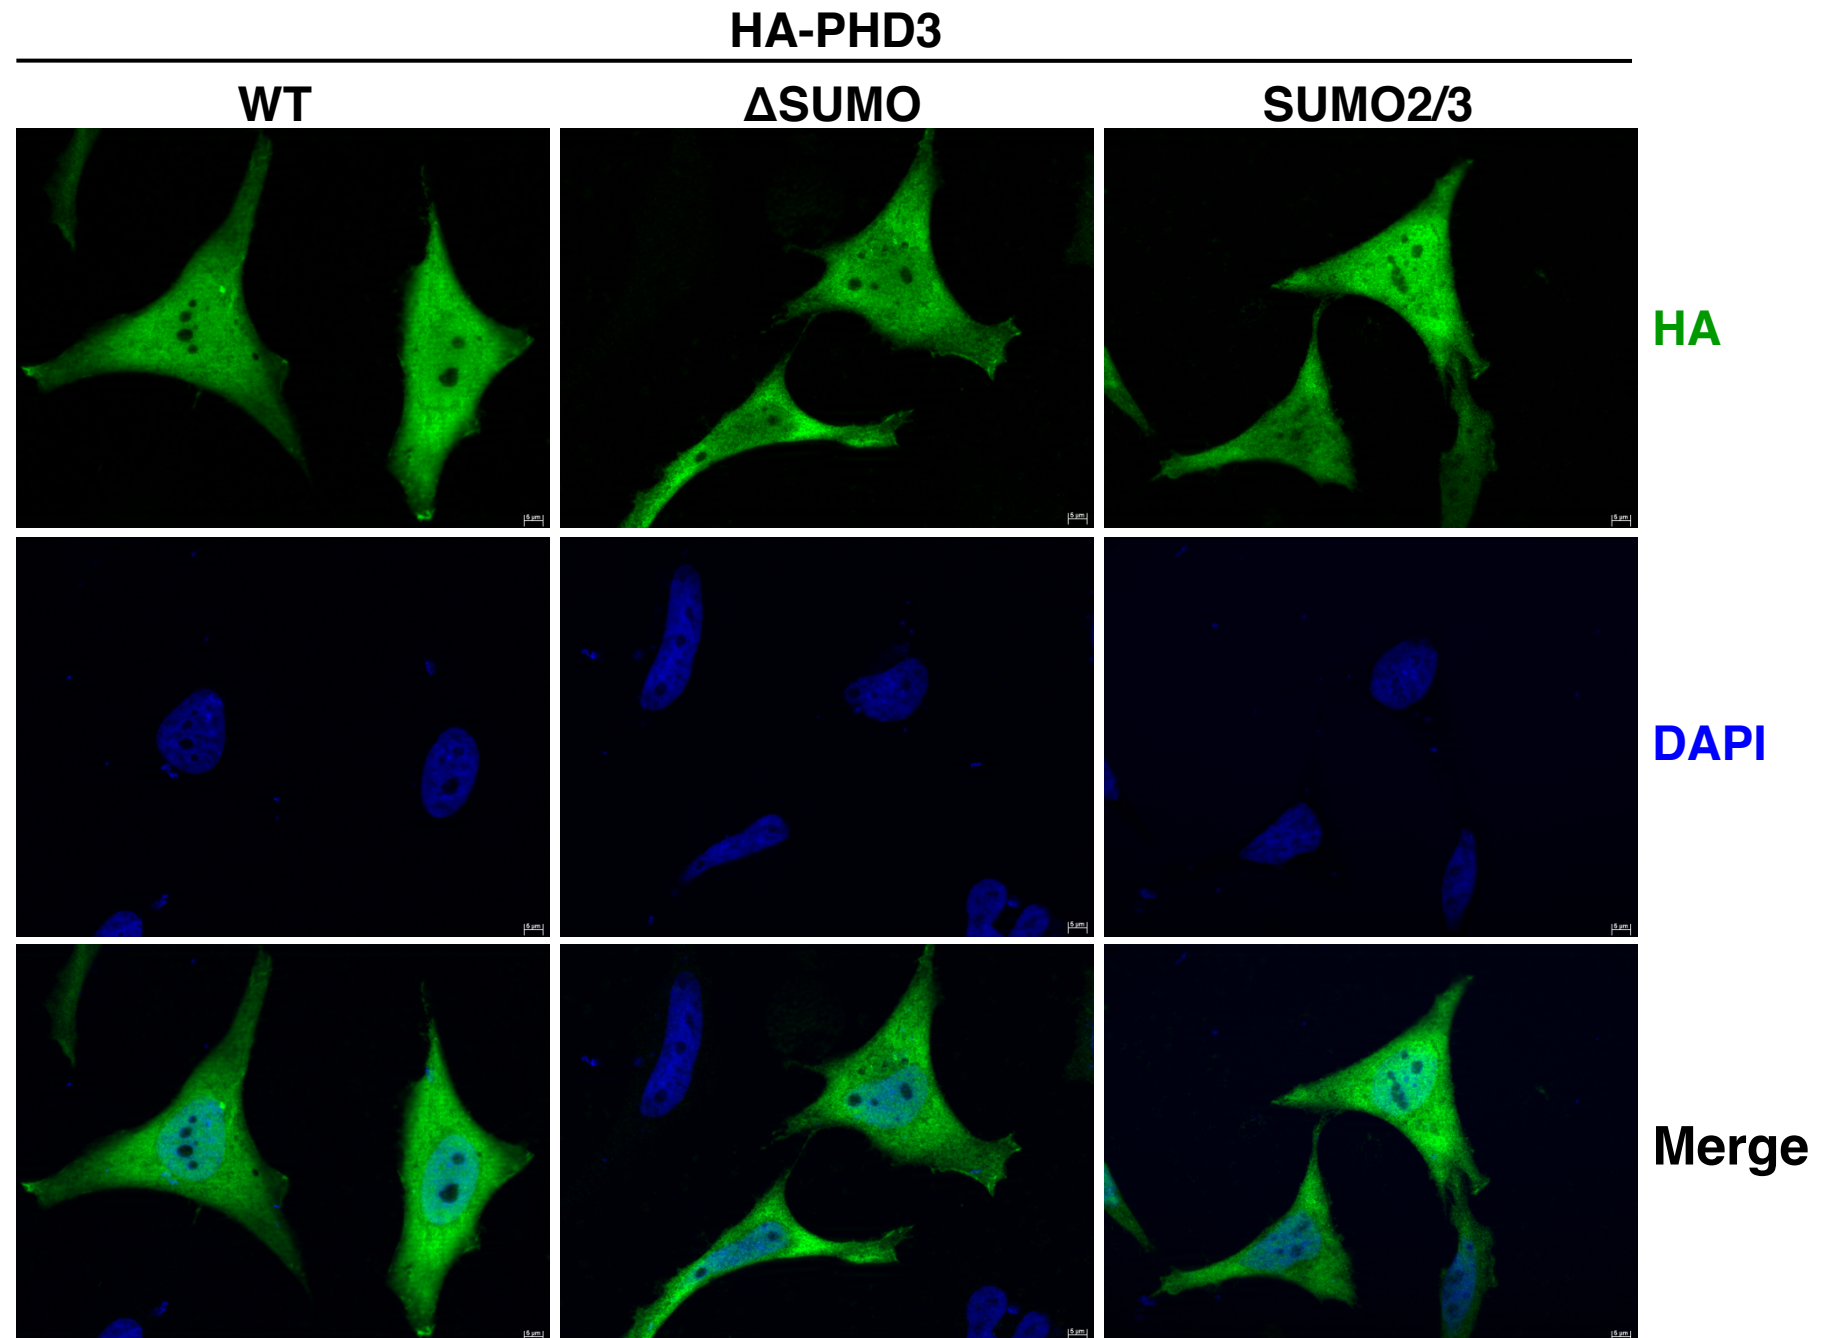

**Figure S4.**

**A**

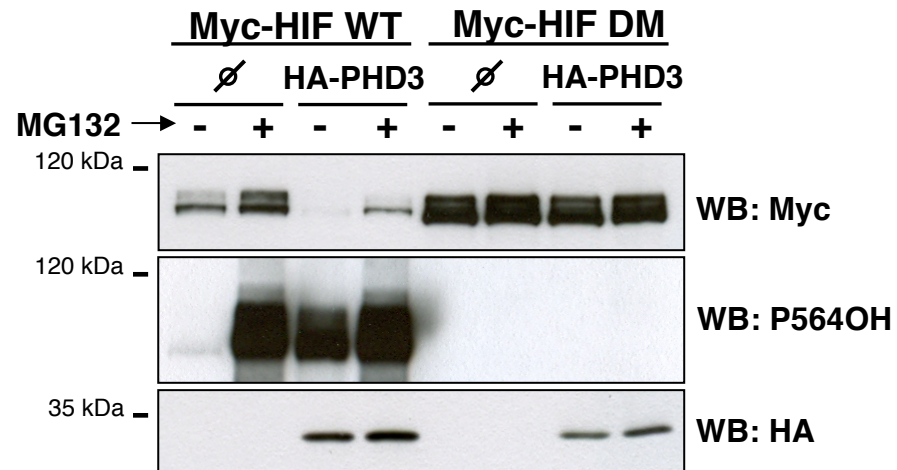

**B**

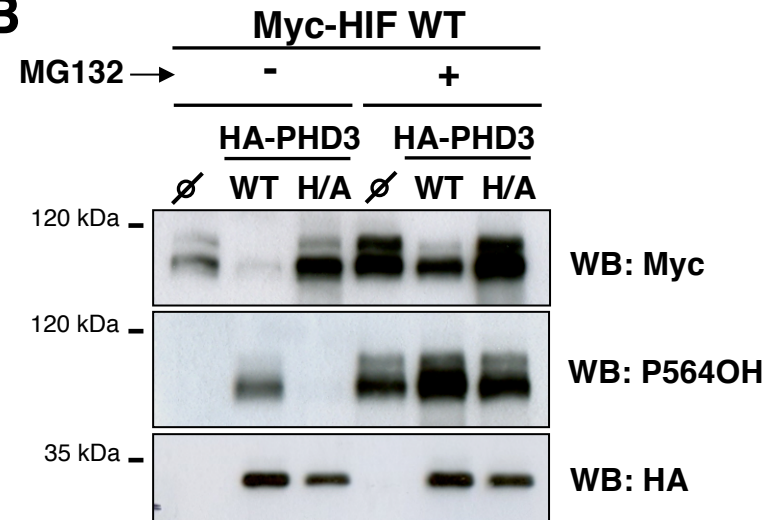

**C**

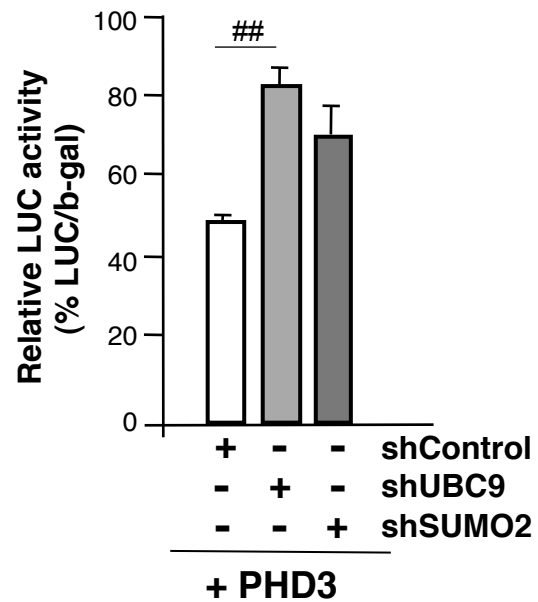

**D**

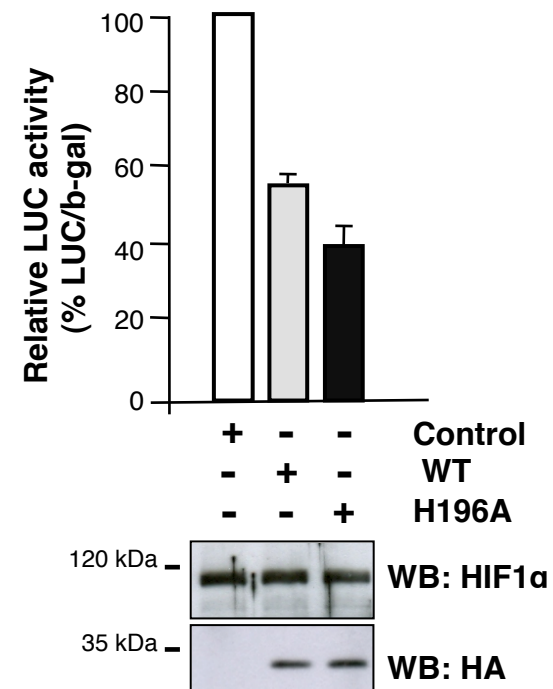

## Supplementary Table1.

| MUTANTS               | OLIGO SENSE                                                                |
|-----------------------|----------------------------------------------------------------------------|
| HA-PHD3 K119R         | 5'-GTCAAGGAGAGGT <u>CTA</u> <u>G</u> AGCAATGGTGGCTTGCTATCCG -3'            |
| HA-PHD3 K154R         | 5'-CTACTATCTGAACA <u>G</u> GAATTGGGATGCCAAGCT <u>T</u> CATGGTGGGATC-3'     |
| HA-PHD3 K159R         | 5'-GAATTGGGATGCCA <u>G</u> GCTACATGGTGG <u>C</u> ATCCTGCGGATATTTC-3'       |
| HA-PHD3 K172R         | 5'-CTGCGGATATTTCCAGAGGGG <u>A</u> GATC <u>T</u> TTTCATAGCAGATGTGGAG-3'     |
| HA-PHD3 K222R         | 5'-GAAAGGGCAGAAGCCA <u>G</u> AAAGAAATTCAGGAATTTAACTAG-3'                   |
| HA-PHD3 K223R         | 5'-GAAAGGGCAGAAGCCAAAA <u>G</u> GAAATTCAGGAATTTAACTAG-3'                   |
| HA-PHD3 K224R         | 5'-GAAAGGGCAGAAGCCAAAAAG <u>A</u> GATTCAGGAATTTAACTAG-3'                   |
| HA-PHD3 K231R         | 5'-CAGGAATTTAACTAGGA <u>G</u> AACTGAATCTGCCCTCACTG-3'                      |
| HA-PHD3 K222/223/224R | 5'-GAAGAAAGGGCAGAAGCCAG <u>A</u> AG <u>G</u> AGATTCAGGAATTTAACTAGG-3'      |
| HA-PHD3 H196A         | 5'-CTGGTCAGATCGTAGGAACCC <u>T</u> <u>G</u> <u>C</u> AAGTGCAGCCCTCTTACGC-3' |

Underlining indicates the enzymatic restriction site modified by the silent mutation.

**Fig. S1. Mapping the PHD3 SUMOylation site(s).** *In vitro* SUMOylation of the PHD3 constructs corresponding to the individual mutation of the 8 conserved Ks located at the C-ter end of the protein. The non-modified (◀) and the modified (\*) forms of PHD3 were detected by autoradiography.

**Fig. S2. PHD3 SUMO1 conjugation does not impact on HIF either NF-κB activity.** PHD3 WT and PHD3 SUMO1 constructs were transfected together with HRE-Luc (A) or NF-κB-Luc (B). After 16 h of hypoxia (A, 1% O<sub>2</sub>) or TNFα (B, 20 ng/ml) treatment, luciferase and β-galactosidase activity were measured. (C) Endogenous SUMOylation impacts on HIF activity. The indicated pools of shRNAs together with HRE-Luc reporter vector were transfected. Cells were incubated in normoxia (20% O<sub>2</sub>) or hypoxia (1% O<sub>2</sub>) for 16 h and luciferase and β-galactosidase activity were measured. Data show the mean±s.e.m.; #*P*<0.05, ###*P*<0.001 versus control cells.

**Fig. S3. PHD3 SUMO conjugation does not affect PHD3 localisation.** Immunofluorescence staining showing HeLa cells transfected with the indicated HA-tagged PHD3 constructs using the anti-HA antibody. Nuclei were visualized by DAPI staining. Scale bar: 5μm.

**Fig. S4. Validation of the anti-HIF1αP564OH antibody.** (A,B) HEK293T cells were transfected with Myc-HIF1 WT or Myc-HIF1 DM (P402/564A) with or without the indicated HA-PHD3 constructs. Cells were lysed after 4 h of MG132 treatment (10 μM) and proteins visualized by WB. ø, empty vector. (C) Endogenous SUMOylation impacts on PHD3-mediated repression of HIF. HEK293T were transfected with the reporter plasmids, Myc-HIF1 DM (P402/564A), PHD3 and the indicated shRNAs. ##*P*<0.01 versus control cells. (D) PHD3-mediated repression is independent of hydroxylase activity. Cells were transfected with the reporters, Myc-HIF1 DM (P402/564A) and the PHD3 constructs. Luciferase and β-galactosidase activity was measured in cells incubated in normoxia (20% O<sub>2</sub>). Data show the mean±s.e.m. In parallel, cells were transfected to analyse protein expression levels by WB.

**Supplementary Table 1.** Sequences of the primers used for mutagenesis. The mutations designed to replace the lysine (K) residue by arginine (R) or histidine (H) by alanine (A) are shown in red. Some oligos contain an additional silent mutation (in blue), which modifies the enzymatic restriction pattern of the mutated construct.
